# Supplementary material for: Magnetic Resonance Imaging (MRI) reveals high cardiac ejection fractions in red-footed tortoises (Chelonoidis carbonarius)
Source: Oxford University Press journal article supplement (doi:10.1242/jeb.206714), 2019-01-01
Supplement: jeb206714supp.pdf [file jeb206714supp.pdf]

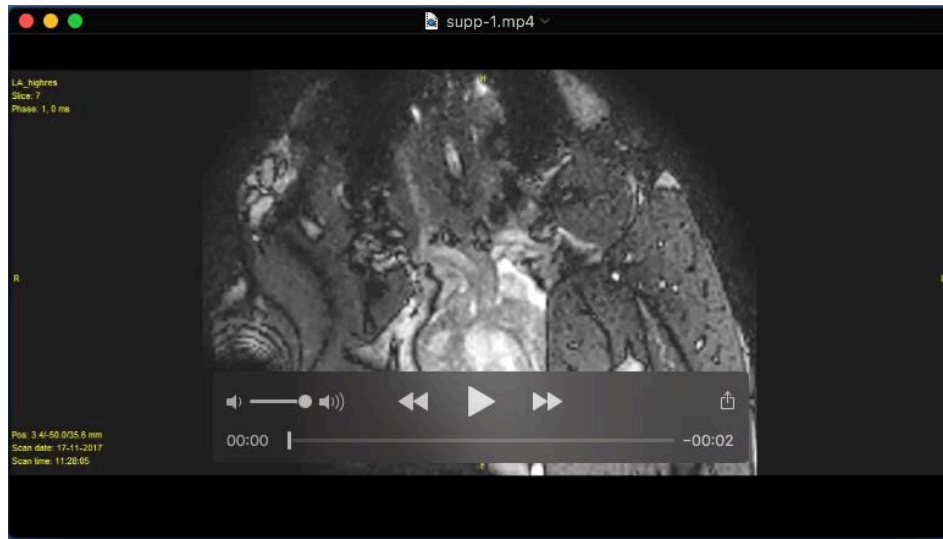

Movie 1. Coronal long axis view.

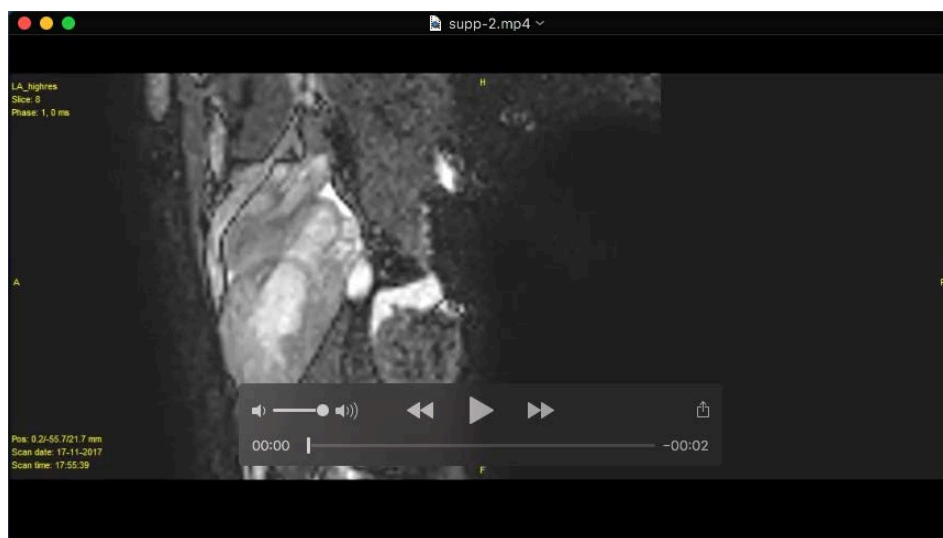

Movie 2. Sagittal long axis view.

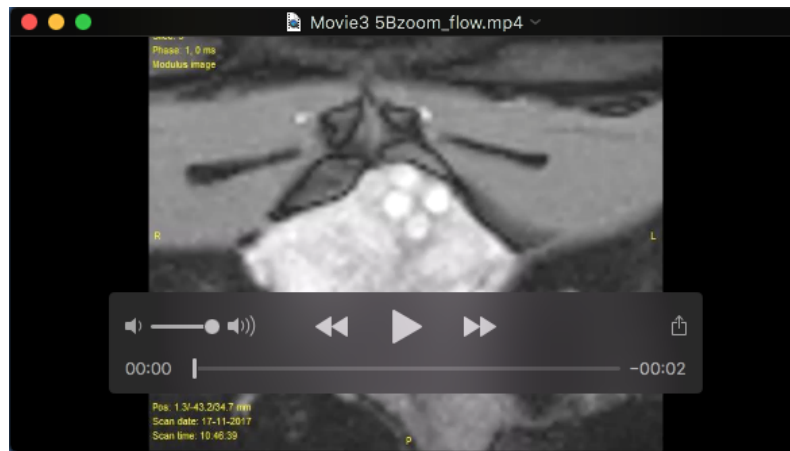

Movie 3. Cross-sectional flow measurements in the tortoise cardiac outflow tract. Slice thickness 4 mm, voxel  $0.8 \times 0.8$  mm at 27 frames per cardiac cycle with velocity sensitivity parameter  $50 \text{ cm s}^{-1}$ . See Fig. 1 for key to vessel identity.

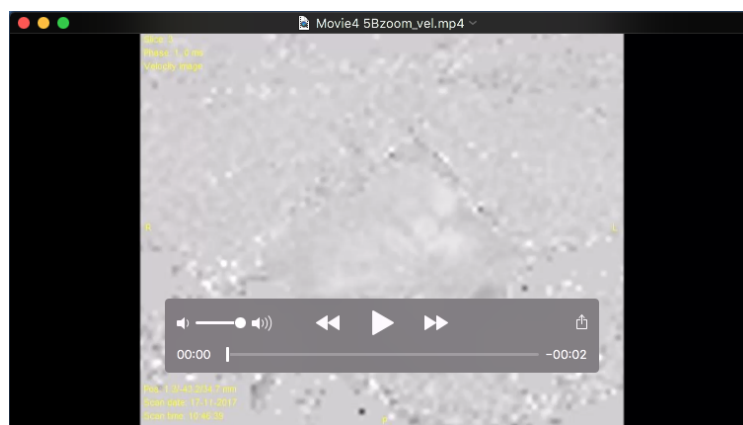

Movie 4. Cross-sectional images: velocity determination in the cardiac outflow tract. Slice thickness 4 mm, voxel  $0.8 \times 0.8$  mm at 27 frames per cardiac cycle with velocity sensitivity parameter  $50 \text{ cm s}^{-1}$ . See Fig. 1 for key to vessel identity.
